# Supplementary material for: The neutrophil-mobilizing cytokine interleukin-26 in the airways of long-term tobacco smokers
Source: PubMed Central journal article supplement (PMC6365630; doi:10.1042/cs20180057), 2018-05-21

# Supplementary Fig. 1

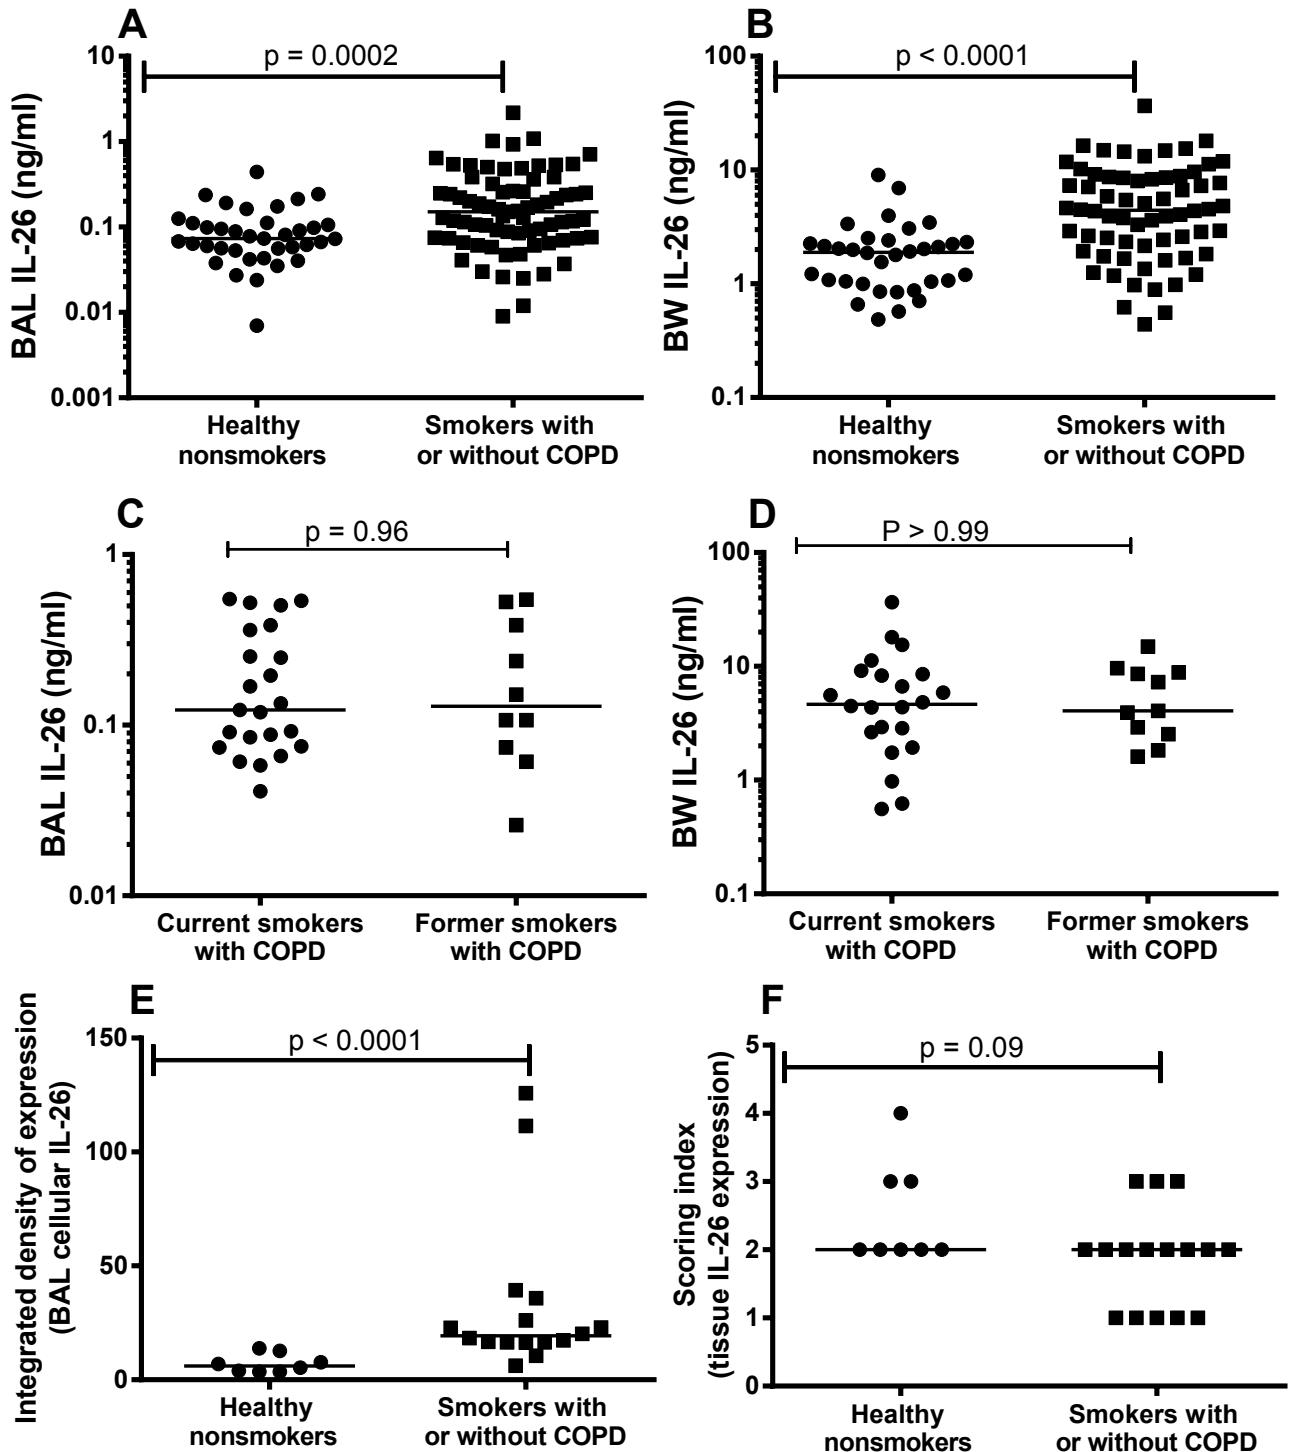

## Supplementary Fig. 2

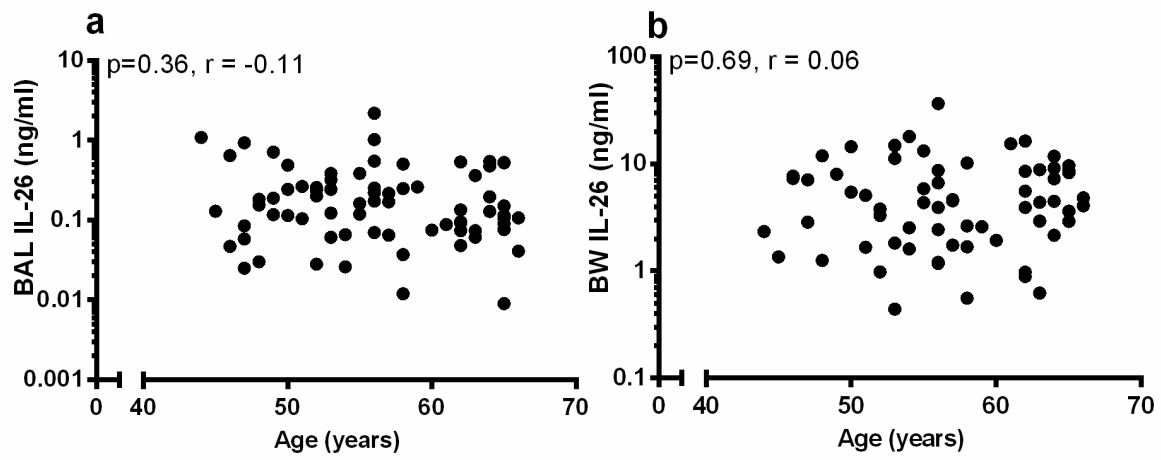

# Supplementary Fig. 3

## A

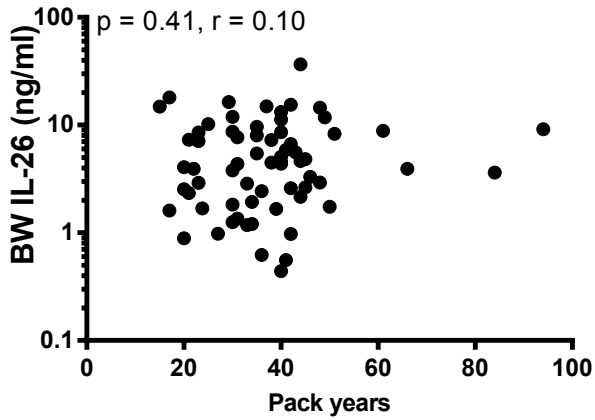

## B

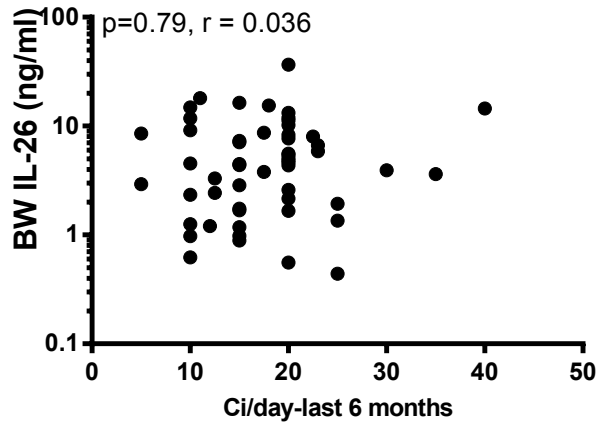

## C

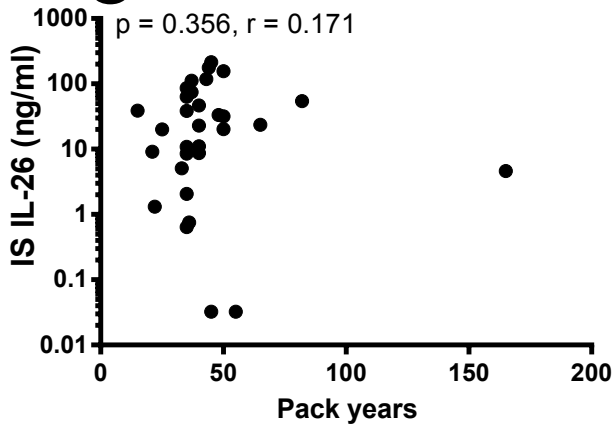

## D

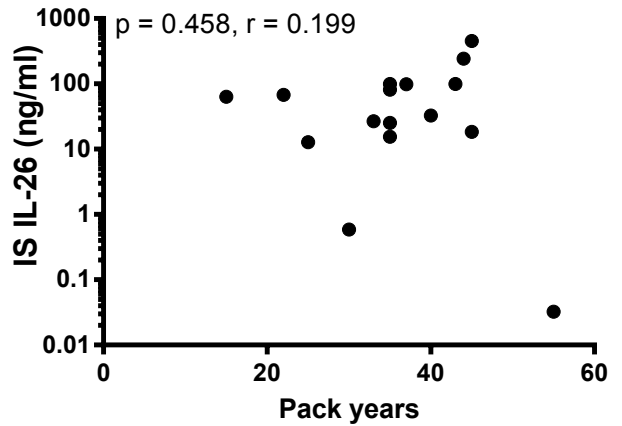

## E

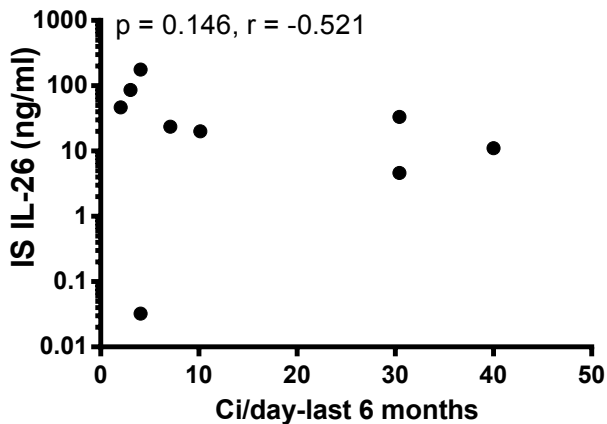

## F

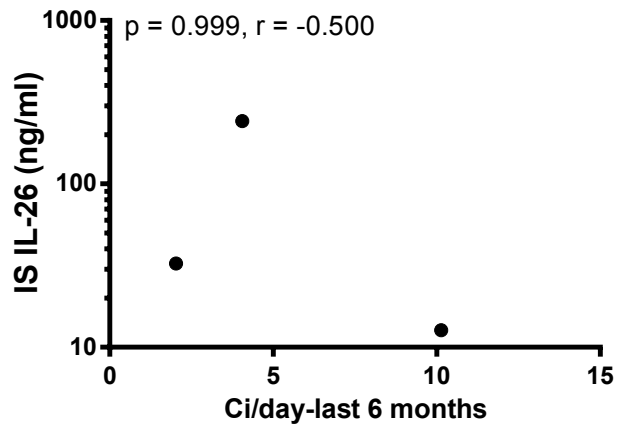

# Supplementary Fig. 4

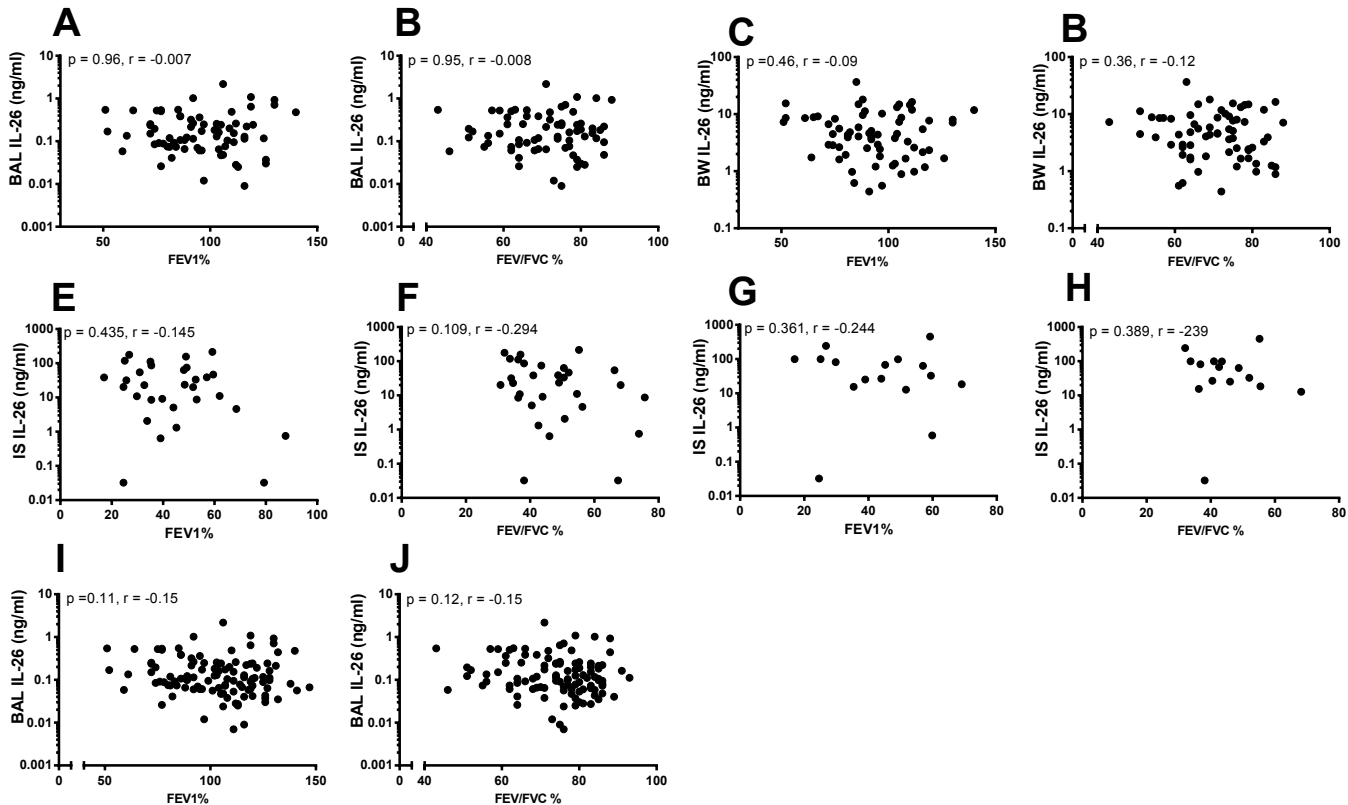

Supplement: cs-132-cs20180057_supp1.pdf [file cs-132-cs20180057_supp1.pdf]
